# Supplementary material for: A systematic review of substance use and substance use disorder research in Kenya
Source: PubMed Central journal article supplement (PMC9186181; doi:10.1371/journal.pone.0269340), 2022-06-09
Supplement: pone.0269340.s002.pdf [file pone.0269340.s002.pdf]

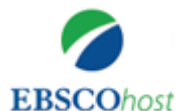

Thursday, August 20, 2020 12:54:35 PM

| #  | Query                                                                                                                                                                                                                                                                                                                                                                                                                                         | Limiters/Expanders                                                     | Last Run Via                                                                                              | Results   |
|----|-----------------------------------------------------------------------------------------------------------------------------------------------------------------------------------------------------------------------------------------------------------------------------------------------------------------------------------------------------------------------------------------------------------------------------------------------|------------------------------------------------------------------------|-----------------------------------------------------------------------------------------------------------|-----------|
| S4 | (Kenya OR eldoret OR nairobi OR mombasa) AND (S1 AND S2 AND S3)                                                                                                                                                                                                                                                                                                                                                                               | Expanders - Apply equivalent subjects<br>Search modes - Boolean/Phrase | Interface - EBSCOhost<br>Research Databases<br>Search Screen - Advanced Search<br>Database - APA PsycInfo | 173       |
| S3 | Kenya OR eldoret OR nairobi OR mombasa                                                                                                                                                                                                                                                                                                                                                                                                        | Expanders - Apply equivalent subjects<br>Search modes - Boolean/Phrase | Interface - EBSCOhost<br>Research Databases<br>Search Screen - Advanced Search<br>Database - APA PsycInfo | 4,551     |
| S2 | Prevalence OR "pattern of use" OR treatment OR prevention OR intervention                                                                                                                                                                                                                                                                                                                                                                     | Expanders - Apply equivalent subjects<br>Search modes - Boolean/Phrase | Interface - EBSCOhost<br>Research Databases<br>Search Screen - Advanced Search<br>Database - APA PsycInfo | 1,302,607 |
| S1 | "Substance use disorder" OR "substance abuse" OR "substance dependence" OR addiction OR addicts OR "alcohol use disorders" OR "alcohol abuse" OR "alcohol dependence" OR "alcohol addiction" OR "tobacco use" OR cigarette OR smoking OR "nicotine addiction" OR "cannabis use" OR marijuana OR bhang OR miraa OR khat OR shisha OR opioid OR "heroin users" OR "injecting drug users" OR "people who inject drugs" OR "people who use drugs" | Expanders - Apply equivalent subjects<br>Search modes - Boolean/Phrase | Interface - EBSCOhost<br>Research Databases<br>Search Screen - Advanced Search<br>Database - APA PsycInfo | 264,483   |
